# Supplementary material for: Clonal Genotype of Geomyces destructans among Bats with White Nose Syndrome, New York, USA
Source: PubMed Central journal article supplement (PMC3381392; doi:10.3201/eid1707.102056), 2011-07
Supplement: 10-2056-Techapp.pdf [file 10-2056-Techapp.pdf]

# Clonal Genotype of *Geomyces destructans* among Bats with White Nose Syndrome, New York, USA

## Technical Appendix

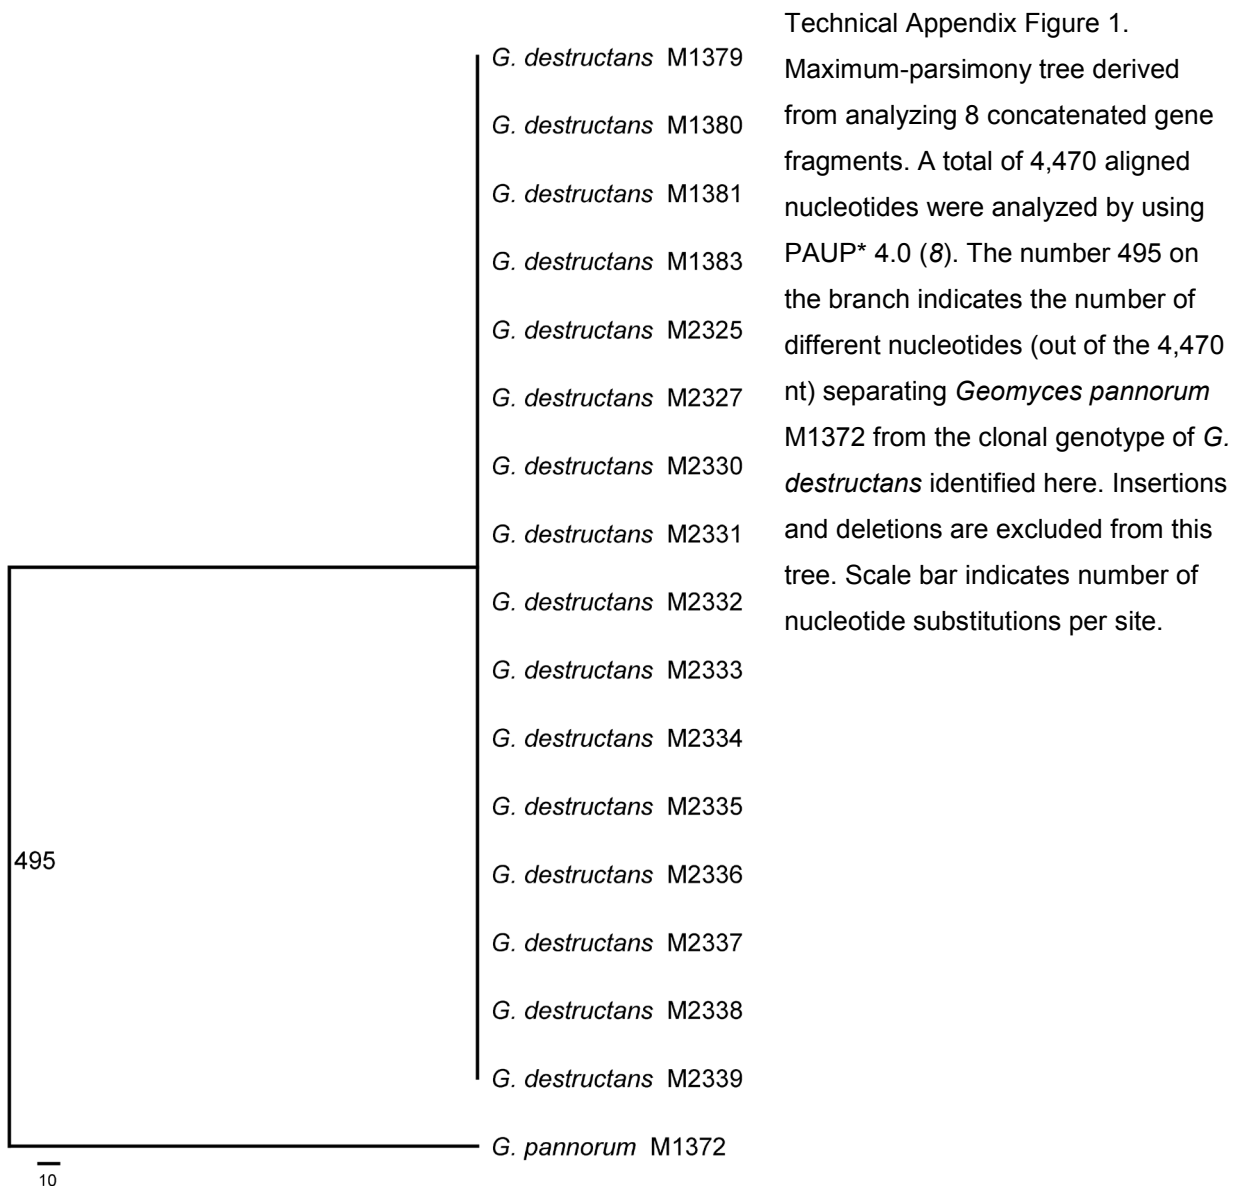

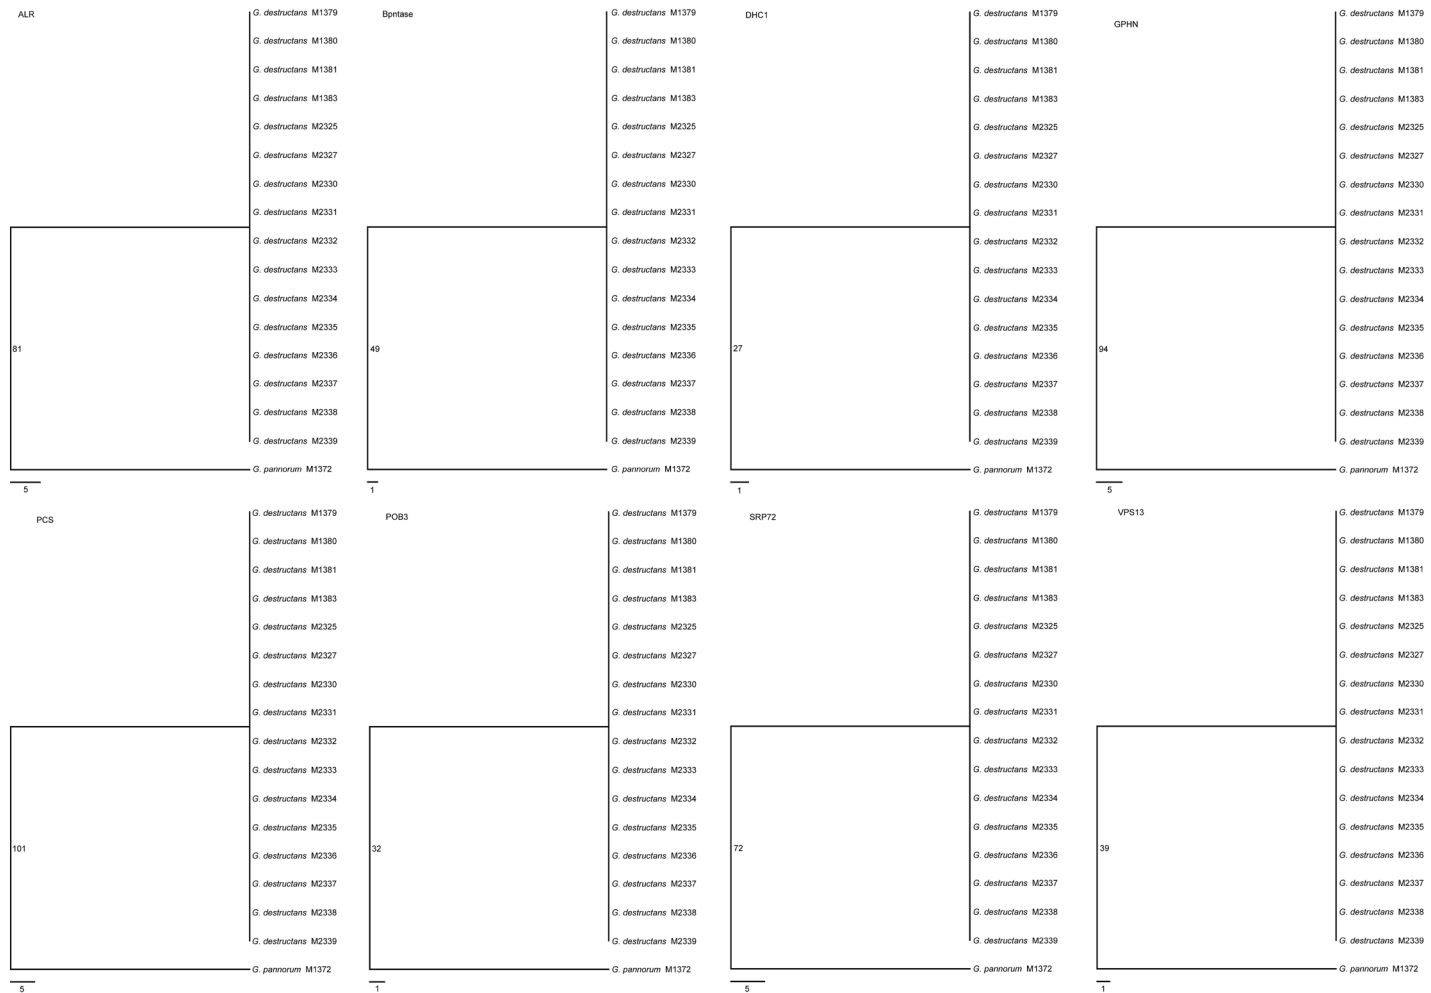

Technical Appendix Figure 2. Maximum parsimony trees derived from individual target sequences. Alpha-L-rhamnosidase (*ALR*), 530 aligned nucleotides with 81 nt difference between *Geomyces destructans* and *G. pannorum*; 3'(2'),5'-bisphosphate nucleotidase (*Bpntase*), 667 nt/49

nucleotide difference; dynein (*DHC1*), 417 nt /27 difference; gephyrin molybdenum cofactor biosynthesis protein (*GPHN*), 522 nt/94 nt difference; peroxisomal-coenzyme A synthetase (*PCS*), 719 nt/101 nt difference; FACT complex subunit (*POB3*), 413 nt/32 nt difference; signal recognition particle protein 72 (*SRP72*), 613 nt/72 nt difference; vacuolar protein sorting-associated protein (*VPS13*), 527 nt/39 nt difference. The tree topologies were identical when neighbor-joining methods were used for analysis. Scale bars indicate number of nucleotide substitutions per site.

Technical Appendix Figure 3 (below). Multiple alignments of 8 target gene fragments. Synonymous substitutions are shaded light gray while nonsynonymous substitution are dark gray and amino acid changes are highlighted in red. A smaller fragment of nucleotides used in phylogenetics construct was used in this comparison. Putative amino acid sequences for *Geomyces destructans* and *G. pannorum* were deduced by using EMBOSS Transeq (EMBL-EBI, Cambridgeshire, UK). Homologous sequences from either *Ajellomyces dermatitidis*, *Arthroderma otae*, *Aspergillus nidulans*, *Aspergillus clavatus*, *Botryotinia fuckeliana*, *Glomerella graminicola*, *Nectria hematococca*, *Sclerotinia sclerotiorum*, and *Verticillium albo-atrum* were included in this comparison.

ALR (Alpha-L-rhamnosidase): □450 bases aligned (Gd = *Geomyces destructans*, Gp = *Geomyces pannorum*  
An = *Aspergillus nidulans*, Va = *Verticillium albo-atrum*)

|        |     |     |     |     |     |     |     |     |     |     |     |     |     |     |     |     |     |     |     |     |
|--------|-----|-----|-----|-----|-----|-----|-----|-----|-----|-----|-----|-----|-----|-----|-----|-----|-----|-----|-----|-----|
| Gd-DNA | CTC | TCT | ACA | AAA | CTC | TTG | GCA | CCG | GAT | GCG | CCG | CCC | GTT | ACG | GTC |     |     |     |     |     |
| Gp-DNA | CTC | TCT | ACA | AAA | CTC | ATC | GCT | CCA | GAT | GCG | CCA | CCC | GTC | ACT | GTG |     |     |     |     |     |
| An-DNA | CCA | GAG | ACG | CAG | CTG | GTG | GCG | CCA | AAC | GCG | CCA | CCA | GTG | CGA | GTG |     |     |     |     |     |
| Va-DNA | GAT | ACC | GTC | CAG | CTC | CAT | GCG | GGT | GAC | GCC | GAG | CCT | GTT | CGA | CGC |     |     |     |     |     |
| Gd-PRO |     |     |     | K   | L   | L   | A   | P   | D   | A   | P   | P   | V   | T   | V   |     |     |     |     |     |
| Gp-PRO |     |     |     | K   | L   | I   | A   | P   | D   | A   | P   | P   | V   | T   | V   |     |     |     |     |     |
| An-PRO |     |     |     | Q   | L   | V   | A   | P   | N   | A   | P   | P   | V   | R   | V   |     |     |     |     |     |
| Va-PRO |     |     |     | Q   | L   | H   | A   | G   | D   | A   | E   | P   | V   | R   | R   |     |     |     |     |     |
|        |     |     |     |     |     |     |     |     |     |     |     |     |     |     |     |     |     |     |     |     |
| Gd-DNA | ACA | GAA | GAG | GTC | AAC | CCA | GTC | GAT | ATT | ATC | AAG | ACA | AAG | TCC | GGG | AAA | ACA | GTC | ATT | GAT |
| Gp-DNA | ACA | GAA | GAG | CTG | AGC | CCA | ACT | GAG | ATT | ATC | AAG | ACA | AAG | TCC | GGC | AAA | ACG | GTC | ATT | GAC |
| An-DNA | ACC | GAA | GTG | GTC | AAT | CCA | GTT | GAA | ATC | ATT | CGC | ACG | CCG | TCC | GGC | AAA | GTA | ATC | ATT | GAT |
| Va-DNA | CTC | GAA | ATC | GTC | AAG | CCC | ATC | GAA | AAG | ATC | ACG | ACC | CCC | TCC | GGA | AAG | ACG | GTG | CTT | GAC |
| Gd-PRO | T   | E   | E   | V   | N   | P   | V   | D   | I   | I   | K   | T   | K   | S   | G   | K   | T   | V   | I   | D   |
| Gp-PRO | T   | E   | E   | L   | S   | P   | T   | E   | I   | I   | K   | T   | K   | S   | G   | K   | T   | V   | I   | D   |

An-PRO T E V V N P V E I I R T P S G K V I I D  
 Va-PRO L E I V K P L E K I T T P S G K T V L D

Gd-DNA TTT GGG CAG AAC CTG GTA GGC AAG CTT CGT GTC AGC TCC GTC CGA CTC CCC GCG GGT CA  
 Gp-DNA TTT GGG CAG AAC CTC GTA GGG AAA CTT CGT GTC AAC TCC GTC CGA CTC CCT GCC GGT GA  
 An-DNA TTT GGG CAA AAC CTC GTT GGC CGT GTC CGG ATC CGC TCC GTA AAG AAG ACC GTG GGC CA  
 Va-DNA TTT GGG CAG AAC CTC GTA GGC TAC CTT CGG GTC AAC AAA GTC AGG GGT CCC CGC GGC CA  
 Gd-PRO F G Q N L V G K L R V S S V R L P A G Q  
 Gp-PRO F G Q N L V G K L R V N S V R L P A G E  
 An-PRO F G Q N L V G R V R L R S V K K T V G H  
 Va-PRO F G Q N L V G Y L R V N K V R G P R G H

Gd-DNA G AAG ATC TCA TTT ACA CAT GTC GAA GTG CTC GAG AAT GGC GAA ATC GGC ACA CGT CCG CT  
 Gp-DNA G AAA ATC ACA TTT ACA CAC GTC GAG GTA CTC GAG AAT GGC GAA ATT AGC ACC CGA CCG CT  
 An-DNA C TCT ATC ATT CTC AAG CAT GCG GAA GTG CTC GAG AAT AGC GAA CTT GGA ACG CGT CCG CT  
 Va-DNA T AAA ATC ACC CTG CTG CAC GCC GAG GTT CTC GAG AAG GGC GAG CTT GGC ATC CGG CCG CT  
 Gd-PRO K I S F T H V E V L E N G E I G T R P L  
 Gp-PRO K I T F T H V E V L E N G E I S T R P L  
 An-PRO S I I L K H A E V L E N S E L G T R P L  
 Va-PRO K I T L L H A E V L E K G E L G I R P L

Gd-DNA T CGA GGA GCA GTC TGC GTT GAT ACT ATT GTC TTT TCT GAA AAG GAG CTC CGC GGC ==  
 Gp-DNA T CGA GAA GCA GTA CCC GTC GAT ACT GTC ATC TTT TCT GAT AAC GAG CTC CTG AAC ==  
 An-DNA G CGA GTG GCC AAG GCC CAG GAC GAG ATC ATC TCA GCA GGA CAG GAG ATT TGT GAC ==  
 Va-DNA G CGT GAC TGC AAG GCC CGG GAC ATC TAC ACC CTC TGT GGT GAT GAG GCT GGC GAA TC  
 Gd-PRO R G A V C V D T I V F S E K E L R G -  
 Gp-PRO R E A V P V D T V I F S D N E L L N -  
 An-PRO R V A K A Q D E I I S A G Q E T C D -  
 Va-PRO R D C K A R D I Y T L C G D E A G E S

Gd-DNA - TGG TCG CCG AAA TTC ACA TTC CAC GGC TTC CAG TAC GTG CAG GTT GAA GGG TGG CCA GC  
 Gp-DNA - TGG TCC CCA AAA TTC ACA TTT CAT GGT TTC CAG TAC GTG CAA GTT GAT GGG TGG CCA GC  
 An-DNA - TGG GCT CCT AGC TTT ACT TTC CAT GGC TTC CGG TAT GTT CAG GTT GAT GGA TGG AGC ==  
 Va-DNA G TAC GAG CCT CGC TTC ACC TTC CAC GGC TTT CGC TAT GCC CAG GTC GAC GAC TGG CCA ==  
 Gd-PRO W S P K F T F H G F Q Y V Q V E G W P A  
 Gp-PRO W S P K F T F H G F Q Y V Q V D G W P A  
 An-PRO W A P S F T F H G F R Y V Q V D G W S -  
 Va-PRO Y E P R F T F H G F R Y A Q V D D W P -

|        |   |     |     |     |     |     |     |     |     |     |     |     |     |     |     |     |     |     |     |     |     |
|--------|---|-----|-----|-----|-----|-----|-----|-----|-----|-----|-----|-----|-----|-----|-----|-----|-----|-----|-----|-----|-----|
| Gd-DNA | A | ACT | GCG | GAT | GCT | GAA | CTC | CCT | --- | TAT | AAG | TCT | GAC | TTT | ACT | GCG | CTA | GTC | ATG | CAT | 445 |
| Gp-DNA | A | ACT | GCG | GAT | GCT | GAA | CTC | CCA | --- | TCT | TTG | TCT | GAC | TTC | ACT | GCA | CTA | GTC | ATG | CAT | 452 |
| An-DNA | - | CCT | GAA | GAC | GCC | GAC | ACC | CCT | CTT | ACT | CTA | CAA | AGC | CTG | ACC | GCC | GAA | GTC | ATG | CAT | 444 |
| Va-DNA | - | TCC | GCA | GAT | ATT | GAC | --- | --- | --- | ATC | CTG | GAC | TCA | CTC | GAG | GCT | GTG | GTC | TGC | AAT | 459 |
| Gd-PRO |   | T   | A   | D   | A   | E   | L   | P   | -   | Y   | K   | S   | D   | F   | T   | A   | L   | V   | M   | H   |     |
| Gp-PRO |   | T   | A   | D   | A   | E   | L   | P   | -   | S   | L   | S   | D   | F   | T   | A   | L   | V   | M   | H   |     |
| An-PRO |   | P   | E   | D   | A   | D   | T   | P   | L   | T   | L   | Q   | S   | L   | T   | A   | E   | V   | M   | H   |     |
| Va-PRO |   | S   | A   | D   | I   | D   | -   | -   | -   | I   | L   | D   | S   | L   | E   | A   | V   | V   | C   | N   |     |

BPntase (3'(2'),5'-bisphosphate nucleotidase): ~750 bases aligned; Alignment shows 3' region of the protein and the 3' UTR (Ss = *Sclerotinia sclerotiorum*; Af = *Aspergillus fumigatus*)

|        |  |  |  |  |  |  |  |  |  |    |     |     |     |     |     |     |     |     |     |   |
|--------|--|--|--|--|--|--|--|--|--|----|-----|-----|-----|-----|-----|-----|-----|-----|-----|---|
| Gd-DNA |  |  |  |  |  |  |  |  |  | AG | AGC | CAG | CCG | ATC | CGC | ATG | AGC | GAG | AAG | A |
| Gp-DNA |  |  |  |  |  |  |  |  |  | AG | AGC | CAG | CCA | ATC | CGC | ATG | AGC | GAG | AAG | A |
| Ss-DNA |  |  |  |  |  |  |  |  |  | AG | GGT | CAA | TCT | ATT | CAA | ATG | AAG | CCA | GTT | A |
| Af-DNA |  |  |  |  |  |  |  |  |  | AG | AGC | AAG | CCC | ATC | TCG | ATG | CGT | CCC | GTT | C |
| Gd-PRO |  |  |  |  |  |  |  |  |  | S  | Q   | P   | I   | R   | M   | S   | E   | K   |     |   |
| Gp-PRO |  |  |  |  |  |  |  |  |  | S  | Q   | P   | I   | R   | M   | S   | E   | K   |     |   |
| Ss-PRO |  |  |  |  |  |  |  |  |  | G  | Q   | S   | I   | Q   | M   | K   | P   | V   |     |   |
| Af-PRO |  |  |  |  |  |  |  |  |  | S  | K   | P   | I   | S   | M   | R   | P   | V   |     |   |

|        |    |     |     |     |     |     |     |     |     |     |     |     |     |     |     |     |     |     |     |     |   |
|--------|----|-----|-----|-----|-----|-----|-----|-----|-----|-----|-----|-----|-----|-----|-----|-----|-----|-----|-----|-----|---|
| Gd-DNA | AG | GAC | ATC | ACC | GAT | GCC | ACT | TTC | TGC | GAG | AGT | GTT | GAG | GCT | GGC | CAC | TCA | TCT | CAC | GAC | G |
| Gp-DNA | AG | GAT | ATC | ACC | GAT | GCC | ACT | TTC | TGC | GAG | AGT | GTT | GAG | GCT | GGC | CAC | TCG | TCG | CAT | GAC | G |
| Ss-DNA | CG | GAT | TTA | AGT | CAA | GCT | ACA | TTC | TGT | GAG | AGT | GTT | GAG | GCA | GGT | CAC | TCT | TCC | CAT | GGC | G |
| Af-DNA | CG | GAT | ATA | AAA | CAG | GCT | GTC | TTC | TGT | GAA | GGA | GTT | GAG | GCT | GCC | CAC | TCT | GCT | CAA | GGC | G |
| Gd-PRO | K  | D   | I   | T   | D   | A   | T   | F   | C   | E   | S   | V   | E   | A   | G   | H   | S   | S   | H   | D   |   |
| Gp-PRO | K  | D   | I   | T   | D   | A   | T   | F   | C   | E   | S   | V   | E   | A   | G   | H   | S   | S   | H   | D   |   |
| Ss-PRO | T  | D   | L   | S   | Q   | A   | T   | F   | C   | E   | S   | V   | E   | A   | G   | H   | S   | S   | H   | G   |   |
| Af-PRO | P  | D   | I   | K   | Q   | A   | V   | F   | C   | E   | G   | V   | E   | A   | A   | H   | S   | A   | Q   | G   |   |

|        |    |     |     |     |     |     |     |     |     |     |     |     |     |     |     |     |     |     |     |     |   |
|--------|----|-----|-----|-----|-----|-----|-----|-----|-----|-----|-----|-----|-----|-----|-----|-----|-----|-----|-----|-----|---|
| Gd-DNA | AC | CAA | TCT | CAG | ATC | GCC | CAG | AAG | CTG | CAG | ATC | AGC | AAG | CCG | AGC | GTG | CGG | ATG | GAT | TCG | C |
| Gp-DNA | AC | CAG | TCT | CAG | ATC | GCA | CAG | AAG | CTG | CAG | ATT | AGC | AAG | CCA | AGC | GTG | CGA | ATG | GAT | TCG | C |
| Ss-DNA | AT | CAA | CAT | GCC | ATT | GCT | ACC | AAA | TTG | GGT | GTT | ACC | AAG | GCT | AGT | GTC | CGA | ATG | GAT | TCG | C |
| Af-DNA | AC | AAC | GCT | GCC | GTC | GCT | CAG | CTC | CTG | GGT | ATC | ACC | TCC | CCC | AGC | GTG | CGA | CTC | GAC | TCG | C |
| Gd-PRO | D  | Q   | S   | Q   | I   | A   | Q   | K   | L   | Q   | I   | S   | K   | P   | S   | V   | R   | M   | D   | S   |   |
| Gp-PRO | D  | Q   | S   | Q   | I   | A   | Q   | K   | L   | Q   | I   | S   | K   | P   | S   | V   | R   | M   | D   | S   |   |

|        |    |     |     |     |     |     |     |     |     |     |     |     |     |     |     |     |     |     |     |     |   |
|--------|----|-----|-----|-----|-----|-----|-----|-----|-----|-----|-----|-----|-----|-----|-----|-----|-----|-----|-----|-----|---|
| Ss-PRO | D  | Q   | H   | A   | I   | A   | T   | K   | L   | G   | V   | T   | K   | A   | S   | V   | R   | M   | D   | S   |   |
| Af-PRO | D  | N   | A   | A   | V   | A   | Q   | L   | L   | G   | I   | T   | S   | P   | S   | V   | R   | L   | D   | S   |   |
| Gd-DNA | AG | GCC | AAG | TAT | GCC | TCG | ATC | GCC | CGT | GGC | GCT | GGG | GAT | ATT | TAC | CTG | AGA | CTT | CCA | ACC | A |
| Gp-DNA | AG | GCA | AAG | TAT | GCC | TCG | ATC | GCT | CGT | GGT | GCG | GGG | GAT | ATT | TAC | CTC | AGA | CTT | CCA | ACC | A |
| Ss-DNA | AA | GCT | AAA | TAT | GGA | TCG | ATC | GCG | AGA | GGT | GCT | GGA | GAC | ATT | TAC | CTT | AGA | CTT | CCC | GTT | A |
| Af-DNA | AG | GCC | AAG | TAC | TGC | TCA | ATT | GCT | AGA | GGC | GCA | GGC | GAT | ATC | TAC | CTA | CGG | CTA | CCT | GTC | A |
| Gd-PRO | Q  | A   | K   | Y   | A   | S   | I   | A   | R   | G   | A   | G   | D   | I   | Y   | L   | R   | L   | P   | T   |   |
| Gp-PRO | Q  | A   | K   | Y   | A   | S   | I   | A   | R   | G   | A   | G   | D   | I   | Y   | L   | R   | L   | P   | T   |   |
| Ss-PRO | Q  | A   | K   | Y   | G   | S   | I   | A   | R   | G   | A   | G   | D   | I   | Y   | L   | R   | L   | P   | V   |   |
| Af-PRO | Q  | A   | K   | Y   | C   | S   | I   | A   | R   | G   | A   | G   | D   | I   | Y   | L   | R   | L   | P   | V   |   |
| Gd-DNA | GC | GCA | ACG | TAC | CAA | GAG | AAG | ATC | TGG | GAT | CAC | GCT | GCT | GGA | GAC | CTG | ATT | GTT | CGA | GAG | G |
| Gp-DNA | GC | GCA | ACG | TAC | CAG | GAG | AAG | ATC | TGG | GAT | CAC | GCT | GCT | GGA | GAC | CTG | ATT | GTT | AGG | GAG | G |
| Ss-DNA | GC | GCG | ACT | TAC | CAA | GAG | AAG | ATT | TGG | GAT | CAT | GCT | GCT | GGA | GAT | CTT | ATT | GTA | AGA | GAG | G |
| Af-DNA | GA | AAG | GAC | TAC | CAG | GAG | AAG | ATC | TGG | GAT | CAT | GCG | GCT | GGC | GAT | CTC | ATT | GTC | CGC | GAG | G |
| Gd-PRO | S  | A   | T   | Y   | Q   | E   | K   | I   | W   | D   | H   | A   | A   | G   | D   | L   | I   | V   | R   | E   |   |
| Gp-PRO | S  | A   | T   | Y   | Q   | E   | K   | I   | W   | D   | H   | A   | A   | G   | D   | L   | I   | V   | R   | E   |   |
| Ss-PRO | S  | A   | T   | Y   | Q   | E   | K   | I   | W   | D   | H   | A   | A   | G   | D   | L   | I   | V   | R   | E   |   |
| Af-PRO | R  | K   | D   | Y   | Q   | E   | K   | I   | W   | D   | H   | A   | A   | G   | D   | L   | I   | V   | R   | E   |   |
| Gd-DNA | CG | GGA | GGA | CAG | GTT | ACG | GAT | TCA | CTA | GGC | AGA | CGT | CTG | GAT | TTC | AGC | AAG | GGT | AGA | ACT | T |
| Gp-DNA | CA | GGA | GGA | CAG | GTT | ACG | GAT | TCA | CTG | GGC | AGA | CGT | CTG | GAT | TTC | AGC | AAG | GGT | AGA | ACC | T |
| Ss-DNA | CA | GGT | GGA | CAG | GTT | ACT | GAT | TCT | CTC | GGA | CGA | AGA | TTG | GAT | TTC | AGC | AAG | GGA | AGA | ACT | T |
| Af-DNA | CT | GGT | GGA | CAA | GTG | ACC | GAT | ATC | TAT | GGC | CAG | CGC | TTG | GAT | TTC | AGC | AAG | GGA | CGC | ACT | T |
| Gd-PRO | A  | G   | G   | Q   | V   | T   | D   | S   | L   | G   | R   | R   | L   | D   | F   | S   | K   | G   | R   | T   |   |
| Gp-PRO | A  | G   | G   | Q   | V   | T   | D   | S   | L   | G   | R   | R   | L   | D   | F   | S   | K   | G   | R   | T   |   |
| Ss-PRO | A  | G   | G   | Q   | V   | T   | D   | S   | L   | G   | R   | R   | L   | D   | F   | S   | K   | G   | R   | T   |   |
| Af-PRO | A  | G   | G   | Q   | V   | T   | D   | I   | Y   | G   | Q   | R   | L   | D   | F   | S   | K   | G   | R   | T   |   |
| Gd-DNA | TG | GCT | GAG | AAT | AAG | GGT | GTC | GTT | GCC | GCA | CCA | CAG | GCT | CTA | CAC | GCA | CGA | GTC | CTT | GAG | G |
| Gp-DNA | TG | GCT | GAG | AAT | AAG | GGT | GTC | GTT | GCC | GCA | CCA | CAG | GCT | CTA | CAT | GCA | CGA | GTC | CTT | GAG | G |
| Ss-DNA | TG | GCT | GAA | AAC | AAG | GGT | GTC | GTT | GCA | GCT | CCC | GCA | GCC | ATT | CAC | GAC | CAC | GTT | TTG | GAG | G |
| Af-DNA | TG | GCT | GCC | AAC | AAG | GGA | GTC | GTC | GCC | GCT | CCA | GAG | GCC | ATC | CAG | GAC | CAG | GTT | ATT | AGT | G |
| Gd-PRO | L  | A   | E   | N   | K   | G   | V   | V   | A   | A   | P   | Q   | A   | L   | H   | A   | R   | V   | L   | E   |   |
| Gp-PRO | L  | A   | E   | N   | K   | G   | V   | V   | A   | A   | P   | Q   | A   | L   | H   | A   | R   | V   | L   | E   |   |
| Ss-PRO | L  | A   | E   | N   | K   | G   | V   | V   | A   | A   | P   | A   | A   | I   | H   | D   | H   | V   | L   | E   |   |
| Af-PRO | L  | A   | A   | N   | K   | G   | V   | V   | A   | A   | P   | E   | A   | I   | Q   | D   | Q   | V   | I   | S   |   |

|        |    |     |     |     |     |     |     |     |     |                                    |     |     |                         |                |
|--------|----|-----|-----|-----|-----|-----|-----|-----|-----|------------------------------------|-----|-----|-------------------------|----------------|
| Gd-DNA | TT | GTC | AAG | GAG | GTC | CTT | GGC | AAG | AAG | GGA                                | AAC | CTA | TAG                     | -----CAGATATGA |
| Gp-DNA | TT | GTC | AAA | GAA | GTC | CTG | GGC | AAG | AAA | GGA                                | AAC | CTA | TAG                     | -----TAGATATGA |
| Ss-DNA | TG | GTT | AAG | GAG | GTT | TTG | GGG | CCC | AAG | AAA                                | TAA | --- | ATTGTTTCATATATTCGTCACAA |                |
| Af-DNA | CC | GTC | AAG | ACG | GTC | CTG | AAG | CTA | TGA | AGGATGACGCGAACCGGACCAACTGTTGTATCGA |     |     |                         |                |
| Gd-PRO | V  | V   | K   | E   | V   | L   | G   | K   | K   | G                                  | N   | L   | *                       |                |
| Gp-PRO | V  | V   | K   | E   | V   | L   | G   | K   | K   | G                                  | N   | L   | *                       |                |
| Ss-PRO | V  | V   | K   | E   | V   | L   | G   | P   | K   | K                                  | *   |     |                         |                |
| Af-PRO | A  | V   | K   | I   | V   | L   | K   | L   | *   |                                    |     |     |                         |                |

|        |                                                              |
|--------|--------------------------------------------------------------|
| Gd-DNA | ACAATTGAAATAGATTCTA---CATATCGTATAACT-ATCCGCTTGG-GACCCTCCAATT |
| Gp-DNA | ACAGCTG---TAGATTCTA---CATATCGTATAACT-ATCCGCTTGA-GACTCCACAATT |
| Ss-DNA | ATAAAAGCCATGATACCTTGATCCACTTGTACATCG-ACACCATAGATATATCTACAATA |
| Af-DNA | ATCACTAAACCCGTTCTAA--ACCTTTGTTAGATCCTGCACGCTTGATGCGCCTAAAAGT |

|        |                                                              |
|--------|--------------------------------------------------------------|
| Gd-DNA | CTATGACA-----ATATAAG---AGCAATATAATAC-ATGGACG--AATCGTCTATTT   |
| Gp-DNA | CTATGACA-----ATATAAG---AACAATATAATAC-ATGGACG--AATCGTCTATTT   |
| Ss-DNA | CCTACAAATG-----ACATTAT---CTCTAGAGATTAT-TTGGATATTCATCCACTACTT |
| Af-DNA | ACATGAGATAGATACCAATTGGGAAAACAGGAGACTCTGCTGGAAT--ATACATGTACAG |

|        |                                                               |
|--------|---------------------------------------------------------------|
| Gd-DNA | GATCTTCTTGGCCTTCAACCTGATCGTCTCACCGTTGACGAAAATTCCCTTCCCCT--TG  |
| Gp-DNA | GATCTTCTTGCCTTTCAGCTTGATCGTCTCGCCATTGACGAAGATTCCCTTCCCCT--TA  |
| Ss-DNA | AATCTTCTTATTCTTCAACTTAATCTCCTCTCCATTGACAAAAGATTCCCTTCCCCT--TA |
| Af-DNA | AAACAGCCCCAGACCCTGTTCCAAGAAAATGCCAAAGTAAAATAGAAACCACCCAGATC   |

|        |                                                              |
|--------|--------------------------------------------------------------|
| Gd-DNA | TATGGCTCAGGCTTCCCTCCACTGGCGGATTTCCGCAGCAAAGTGCAGAACCCTT---CC |
| Gp-DNA | TATGGCTCAGGCTTCCCTCCATTACGAATTTCCGCAGCGAACTGGAGAACAACCT---CC |
| Ss-DNA | TACGGTTCTGGAAGTCTCCACTTTCTAATTTGCGCAGCGAAAAGTAATACAACCT---CC |
| Af-DNA | ACCGAATCTT-CTTGGCCTTCAGTCTGATTGTCTCTCCGTTACAAAAATACCCTTGCCC  |

|        |                                                              |
|--------|--------------------------------------------------------------|
| Gd-DNA | TTCTCCGGGCCCT-CCAGCAATATTCTCGTTGGCTGCGGTGTGCTGGCCGTCATGCCCTT |
| Gp-DNA | TTCTCTGGGCCCT-CCAGCAATATTCTCGTTGGCTGCGGTGTGCTAGCCGTCATGCCCTT |
| Ss-DNA | TTCTCTGGTCCTT-CTAACAATATACGTGTAGGTTGTGGTGTGCTCGCTTTCACAAATCT |
| Af-DNA | TTGTAAGGCTCTGGCTTCCGCCATTCTC-TGATTTCCGCCGCGAATTGTGTACAAACGTT |

|        |                                      |
|--------|--------------------------------------|
| Gd-DNA | CGGCACTGGCAACTCGA-TAGGATGTGAGTAG 744 |
| Gp-DNA | CGGCACTGGCAACTCGA-TTGGATGTGAGTAC 741 |

Ss-DNA TGGAACGGGTAATTTCGA-TAGGATGAGAGTAC 759  
 Af-DNA TTTGTCTGACTCCCTCAAGCAGAATACGAGTAG 775

DHC1 (Cytoplasmic dynein heavy chain): 418 bases aligned (Ss = *Sclerotinia sclerotiorum*, Bf = *Botryotinia fuckeliana*)

|        |     |     |     |     |     |     |     |     |     |     |     |     |     |     |     |     |     |     |     |     |    |
|--------|-----|-----|-----|-----|-----|-----|-----|-----|-----|-----|-----|-----|-----|-----|-----|-----|-----|-----|-----|-----|----|
| Ss-DNA | GAT | GCT | GAA | TAC | CTA | GAT | CCA | ATC | CTT | AAC | CAC | GTT | CTT | AAC | AAA | GAG | TAT | CAA | AAG | ACT | 60 |
| Bf-DNA | GAT | GCC | GAA | TAC | CTG | GAC | CCA | ATT | CTT | AAC | CAC | GTT | CTC | AAC | AAA | GAG | TAC | CAA | AAG | ACT | 60 |
| Gd-DNA | GAT | GCC | GAG | CAT | TTG | GAT | CCA | ATC | CTT | AAC | CAC | GTC | CTC | AAC | AAG | GAA | TAC | CAA | AAG | ACT | 60 |
| Gp-DNA | GAT | GCC | GAG | CAT | TTG | GAT | CCG | ATC | CTT | AAT | CAT | GTC | CTC | AAC | AAG | GAG | TAC | CAA | AAG | ACT | 60 |
| Ss-PRO | D   | A   | E   | Y   | L   | D   | P   | I   | L   | N   | H   | V   | L   | N   | K   | E   | Y   | Q   | K   | T   |    |
| Bf-PRO | D   | A   | E   | Y   | L   | D   | P   | I   | L   | N   | H   | V   | L   | N   | K   | E   | Y   | Q   | K   | T   |    |
| Gd-PRO | D   | A   | E   | H   | L   | D   | P   | I   | L   | N   | H   | V   | L   | N   | K   | E   | Y   | Q   | K   | T   |    |
| Gp-PRO | D   | A   | E   | H   | L   | D   | P   | I   | L   | N   | H   | V   | L   | N   | K   | E   | Y   | Q   | K   | T   |    |

|        |     |     |     |     |     |     |     |     |     |     |     |     |     |     |     |     |     |     |     |     |     |
|--------|-----|-----|-----|-----|-----|-----|-----|-----|-----|-----|-----|-----|-----|-----|-----|-----|-----|-----|-----|-----|-----|
| Ss-DNA | GGT | GGA | CGT | GTT | CTT | ATT | CAG | CTT | GGT | AAG | CAA | GAA | ATT | GAC | TTT | TCG | CCC | GCA | TTT | AAG | 120 |
| Bf-DNA | GGT | GGG | CGT | GTT | CTC | ATC | CAG | CTT | GGG | AAG | CAA | GAA | ATC | GAT | TTC | TCG | CCC | GCA | TTC | AAG | 120 |
| Gd-DNA | GGT | GGA | CGT | GTC | CTC | ATC | CAG | CTC | GGT | AAA | CAA | GAG | ATC | GAT | TTC | TCC | CCA | GCC | TTC | AAG | 120 |
| Gp-DNA | GGC | GGG | CGT | GTT | CTC | ATC | CAG | CTT | GGC | AAA | CAA | GAA | ATC | GAT | TTC | TCC | CCA | GCC | TTC | AAG | 120 |
| Ss-PRO | G   | G   | R   | V   | L   | I   | Q   | L   | G   | K   | Q   | E   | I   | D   | F   | S   | P   | A   | F   | K   |     |
| Bf-PRO | G   | G   | R   | V   | L   | I   | Q   | L   | G   | K   | Q   | E   | I   | D   | F   | S   | P   | A   | F   | K   |     |
| Gd-PRO | G   | G   | R   | V   | L   | I   | Q   | L   | G   | K   | Q   | E   | I   | D   | F   | S   | P   | A   | F   | K   |     |
| Gp-PRO | G   | G   | R   | V   | L   | I   | Q   | L   | G   | K   | Q   | E   | I   | D   | F   | S   | P   | A   | F   | K   |     |

|        |     |     |     |     |     |     |     |     |     |     |     |     |     |     |     |     |     |     |     |     |     |
|--------|-----|-----|-----|-----|-----|-----|-----|-----|-----|-----|-----|-----|-----|-----|-----|-----|-----|-----|-----|-----|-----|
| Ss-DNA | ATC | TAC | CTT | TCC | ACT | AGA | GAT | CCA | TCT | GCA | ACA | TTC | GCA | CCG | GAT | ATT | TGC | AGT | CGG | ACA | 180 |
| Bf-DNA | ATT | TAC | CTT | TCC | ACC | AGA | GAT | CCA | TCT | GCA | ACA | TTC | GCA | CCG | GAC | ATT | TGC | AGT | CGC | ACA | 180 |
| Gd-DNA | ATC | TAC | CTC | TCG | ACC | AGA | GAT | CCA | TCT | GCT | ACG | TTT | GCA | CCA | GAC | ATA | TGC | AGT | CGC | ACA | 180 |
| Gp-DNA | ATC | TAT | CTC | TCA | ACC | AGA | GAT | CCA | TCT | GCT | ACA | TTT | GCA | CCA | GAT | GTA | TGC | AGT | CGC | ACA | 180 |
| Ss-PRO | I   | Y   | L   | S   | T   | R   | D   | P   | S   | A   | T   | F   | A   | P   | D   | I   | C   | S   | R   | T   |     |
| Bf-PRO | I   | Y   | L   | S   | T   | R   | D   | P   | S   | A   | T   | F   | A   | P   | D   | I   | C   | S   | R   | T   |     |
| Gd-PRO | I   | Y   | L   | S   | T   | R   | D   | P   | S   | A   | T   | F   | A   | P   | D   | I   | C   | S   | R   | T   |     |
| Gp-PRO | I   | Y   | L   | S   | T   | R   | D   | P   | S   | A   | T   | F   | A   | P   | D   | V   | C   | S   | R   | T   |     |

|        |     |     |     |     |     |     |     |     |     |     |     |     |     |     |     |     |     |     |     |     |     |
|--------|-----|-----|-----|-----|-----|-----|-----|-----|-----|-----|-----|-----|-----|-----|-----|-----|-----|-----|-----|-----|-----|
| Ss-DNA | ACG | TTT | GTC | AAT | TTC | ACT | GTC | ACA | CAA | AGC | AGT | TTA | CAA | ACA | CAG | TCA | CTT | AAT | GAC | GTC | 240 |
| Bf-DNA | ACA | TTT | GTT | AAT | TTC | ACA | GTC | ACA | CAG | AGT | AGT | TTG | CAA | ACA | CAG | TCA | CTC | AAT | GAC | GTT | 240 |



|        |     |     |     |     |     |     |     |     |     |     |     |     |     |     |     |     |     |     |     |     |     |
|--------|-----|-----|-----|-----|-----|-----|-----|-----|-----|-----|-----|-----|-----|-----|-----|-----|-----|-----|-----|-----|-----|
| Gd-DNA | ACT | TTC | GTC | AAT | TTC | ACC | GTC | ACC | CAG | AGC | AGT | CTC | CAA | ACG | CAA | TCA | TTG | AAC | GAA | GTC | 240 |
| Gp-DNA | ACC | TTC | GTG | AAT | TTC | ACT | GTC | ACC | CAG | AGC | AGT | CTC | CAA | ACA | CAA | TCA | TTG | AAC | GAA | GTC | 240 |
| Ss-PRO | T   | F   | V   | N   | F   | T   | V   | T   | Q   | S   | S   | L   | Q   | T   | Q   | S   | L   | N   | D   | V   |     |
| Bf-PRO | T   | F   | V   | N   | F   | T   | V   | T   | Q   | S   | S   | L   | Q   | T   | Q   | S   | L   | N   | D   | V   |     |
| Gd-PRO | T   | F   | V   | N   | F   | T   | V   | T   | Q   | S   | S   | L   | Q   | T   | Q   | S   | L   | N   | E   | V   |     |
| Gp-PRO | T   | F   | V   | N   | F   | T   | V   | T   | Q   | S   | S   | L   | Q   | T   | Q   | S   | L   | N   | E   | V   |     |
|        |     |     |     |     |     |     |     |     |     |     |     |     |     |     |     |     |     |     |     |     |     |
| Ss-DNA | CTC | AAA | TCT | GAG | CGA | CCT | GAT | GTG | GAT | GAG | AGG | CGC | TCA | AAT | CTC | ATC | AAA | TTA | CAG | GGT | 300 |
| Bf-DNA | CTC | AAA | TCC | GAA | CGA | CCT | GAT | GTG | GAC | GAG | AGA | CGC | TCT | AAT | CTC | ATC | AAG | TTA | CAA | GGC | 300 |
| Gd-DNA | CTG | AAA | TCT | GAG | CGA | CCT | GAC | GTG | GAT | GAG | CGA | AGA | TCC | AAC | CTG | ATC | AAA | TTA | CAG | GGA | 300 |
| Gp-DNA | CTG | AAA | TCT | GAG | CGA | CCT | GAC | GTG | GAT | GAA | CGA | AGA | TCC | AAC | CTG | ATC | AAA | TTG | CAG | GGA | 300 |
| Ss-PRO | L   | K   | S   | E   | R   | P   | D   | V   | D   | E   | R   | R   | S   | N   | L   | I   | K   | L   | Q   | G   |     |
| Bf-PRO | L   | K   | S   | E   | R   | P   | D   | V   | D   | E   | R   | R   | S   | N   | L   | I   | K   | L   | Q   | G   |     |
| Gd-PRO | L   | K   | S   | E   | R   | P   | D   | V   | D   | E   | R   | R   | S   | N   | L   | I   | K   | L   | Q   | G   |     |
| Gp-PRO | L   | K   | S   | E   | R   | P   | D   | V   | D   | E   | R   | R   | S   | N   | L   | I   | K   | L   | Q   | G   |     |
|        |     |     |     |     |     |     |     |     |     |     |     |     |     |     |     |     |     |     |     |     |     |
| Ss-DNA | GAA | TTC | AAA | GTT | CAT | CTT | AGA | CAG | CTC | GAG | AAA | CGC | TTG | TTG | CAA | GCA | TTG | AAC | GAA | TCA | 360 |
| Bf-DNA | GAA | TTC | AAA | GTT | CAC | CTC | AGG | CAG | CTC | GAG | AAG | CGC | TTG | CTG | CAA | GCC | CTG | AAC | GAA | TCA | 360 |
| Gd-DNA | GAA | TTC | AAG | GTC | CAT | CTT | CGC | CAA | TTG | GAG | AAG | CGT | CTT | TTG | CAA | GCT | TTG | AAC | GAG | TCC | 360 |
| Gp-DNA | GAA | TTC | AAG | GTC | CAC | CTT | CGC | CAA | TTG | GAG | AAG | CGT | CTT | TTG | CAG | GCT | TTG | AAC | GAG | TCC | 360 |
| Ss-PRO | E   | F   | K   | V   | H   | L   | R   | Q   | L   | E   | K   | R   | L   | L   | Q   | A   | L   | N   | E   | S   |     |
| Bf-PRO | E   | F   | K   | V   | H   | L   | R   | Q   | L   | E   | K   | R   | L   | L   | Q   | A   | L   | N   | E   | S   |     |
| Gd-PRO | E   | F   | K   | V   | H   | L   | R   | Q   | L   | E   | K   | R   | L   | L   | Q   | A   | L   | N   | E   | S   |     |
| Gp-PRO | E   | F   | K   | V   | H   | L   | R   | Q   | L   | E   | K   | R   | L   | L   | Q   | A   | L   | N   | E   | S   |     |
|        |     |     |     |     |     |     |     |     |     |     |     |     |     |     |     |     |     |     |     |     |     |
| Ss-DNA | CGT | GGC | AAT | ATT | CTC | GAT | GAT | GAT | AAC | GTC | ATT | GAA | ACT | CTC | GAA | ACT | TTG | AAG | AAG | G   | 418 |
| Bf-DNA | CGT | GGC | AAT | ATT | CTT | GAT | GAT | GAC | AAC | GTC | ATT | GAA | ACT | CTT | GAG | ACT | TTG | AAG | AAG | G   | 418 |
| Gd-DNA | CGT | GGC | AAT | ATC | TTG | GAT | GAT | GAC | AAC | GTC | ATT | GAG | ACT | CTC | GAG | ACG | TTG | AAG | AAG | G   | 418 |
| Gp-DNA | CGT | GGT | AAT | ATC | TTG | GAT | GAT | GAC | AAC | GTT | ATT | GAA | ACT | CTC | GAA | ACG | TTG | AAG | AAG | G   | 418 |
| Ss-PRO | R   | G   | N   | I   | L   | D   | D   | D   | N   | V   | I   | E   | T   | L   | E   | T   | L   | K   | K   |     |     |
| Bf-PRO | R   | G   | N   | I   | L   | D   | D   | D   | N   | V   | I   | E   | T   | L   | E   | T   | L   | K   | K   |     |     |
| Gd-PRO | R   | G   | N   | I   | L   | D   | D   | D   | N   | V   | I   | E   | T   | L   | E   | T   | L   | K   | K   |     |     |
| Gp-PRO | R   | G   | N   | I   | L   | D   | D   | D   | N   | V   | I   | E   | T   | L   | E   | T   | L   | K   | K   |     |     |

GPHN (Gephyrin): ~300 bases aligned; the alignment starts with non-coding miscellaneous feature



|        |    |     |     |     |     |     |     |     |     |     |     |     |     |     |     |     |     |     |    |     |
|--------|----|-----|-----|-----|-----|-----|-----|-----|-----|-----|-----|-----|-----|-----|-----|-----|-----|-----|----|-----|
| Gd-DNA | TA | AGC | TCT | AGC | GGA | TCT | CAC | GCT | GGC | CAT | CAC | GGC | TAT | GGT | CAC | GGT | CAC | GAC | CA | 303 |
| Gp-DNA | TA | GGC | TCT | GGT | GGA | GCT | CAT | GCT | GGA | CAT | CAT | GGC | CAC | AGC | CAT | GGT | CAC | GGC | CA | 318 |
| Nh-DNA | TA | TCA | GGT | GGA | AAG | CCC | CAA | CCT | GCT | GCC | AGC | CAC | AGT | CAC | GGA | TGC | CAC | AGA | CA | 324 |
| Ac-DNA | TA | GCC | CCC | AAT | GAT | CCG | CGC | TCG | GAA | AGT | CAA | GGA | CAG | CAG | CAT | GAT | CAC | CAT | CA | 354 |
| Gd-PRO | I  | S   | S   | S   | G   | S   | H   | A   | G   | H   | H   | G   | Y   | G   | H   | G   | H   | D   |    |     |
| Gp-PRO | I  | G   | S   | G   | G   | A   | H   | A   | G   | H   | H   | G   | H   | S   | H   | G   | H   | G   |    |     |
| Nh-PRO | L  | S   | G   | G   | K   | P   | Q   | P   | A   | A   | S   | H   | S   | H   | G   | C   | H   | H   |    |     |
| Ac-PRO | V  | A   | P   | N   | D   | P   | R   | S   | E   | S   | Q   | G   | Q   | Q   | H   | D   | H   | H   |    |     |

PCS (Peroxisomal-coenzyme A synthetase): ~480 bases aligned; Alignment shows the exonic region and a predicted intronic region (Ac = *Aspergillus clavatus*; Ao = *Arthroderma otae*)

|        |  |  |  |  |  |  |  |  |  |     |     |     |     |     |   |
|--------|--|--|--|--|--|--|--|--|--|-----|-----|-----|-----|-----|---|
| Gd-DNA |  |  |  |  |  |  |  |  |  | GTA | CCC | TTG | ACA | CAC | A |
| Gp-DNA |  |  |  |  |  |  |  |  |  | GTG | CCC | TTG | ACA | CAC | A |
| Ac-DNA |  |  |  |  |  |  |  |  |  | GTT | CCC | CTG | ACG | CAC | A |
| Ao-DNA |  |  |  |  |  |  |  |  |  | GTA | CCG | CTC | TCA | CAT | A |
| Gd-PRO |  |  |  |  |  |  |  |  |  | V   | P   | L   | T   | H   |   |
| Gp-PRO |  |  |  |  |  |  |  |  |  | V   | P   | L   | T   | H   |   |
| Ac-PRO |  |  |  |  |  |  |  |  |  | V   | P   | L   | T   | H   |   |
| Ao-PRO |  |  |  |  |  |  |  |  |  | V   | P   | L   | S   | H   |   |

|        |    |     |     |     |     |     |     |                                           |
|--------|----|-----|-----|-----|-----|-----|-----|-------------------------------------------|
| Gd-DNA | GG | AAT | TTG | ACG | AGG | ACA | ATG | AGTATGCA--AGCCCCGCTAGTGGCTAGTGGGAGATTCTCA |
| Gp-DNA | GG | AAT | TTG | ACA | AGG | ACT | ATG | AGTATGTA--AATCCGCCCGTGG-----GAGATTTCCA    |
| Ac-DNA | AG | AAC | CTG | ACC | ACT | AGC | ATG | AGTGAGTAC--AACATCCCTGTGT-----GATGTAACTG   |
| Ao-DNA | AA | AAC | CTG | ACC | AGG | ACA | ATG | AGTGGGTGTTGGCTAGTTTTGTTG-----GAGATTTTTTA  |
| Gd-PRO | R  | N   | L   | T   | R   | T   | M   |                                           |
| Gp-PRO | R  | N   | L   | T   | R   | T   | M   |                                           |
| Ac-PRO | K  | N   | L   | T   | T   | S   | M   |                                           |
| Ao-PRO | K  | N   | L   | T   | R   | T   | M   |                                           |

|        |      |                               |     |     |     |     |     |     |     |     |     |     |   |
|--------|------|-------------------------------|-----|-----|-----|-----|-----|-----|-----|-----|-----|-----|---|
| Gd-DNA | ---- | ATTGCTAA-CA--ATT-GACA-GAG     | AAC | ATC | CAG | GCA | ACA | TAT | GAG | TTG | AGC | CCT | G |
| Gp-DNA | ---- | ATTGCTAA-CA--ATTTGGCA-GAG     | AAC | ATA | CAG | GCA | ACA | TAT | GAG | CTG | AGC | CCT | G |
| Ac-DNA |      | GAAGACCACTGA-CGCGGTATCACAAGAC | AAC | ATC | CGG | GCT | ACA | TAT | AAG | TTG | ACC | CCC | G |
| Ao-DNA |      | TTGTCATGCTAAATACATTCTCGTTAGGA | AAC | ATC | CAA | GCT | ACA | TAC | TCT | CTG | ACG | GGT | A |
| Gd-PRO |      |                               | N   | I   | Q   | A   | T   | Y   | E   | L   | S   | P   |   |
| Gp-PRO |      |                               | N   | I   | Q   | A   | T   | Y   | E   | L   | S   | P   |   |

Ac-PRO  
Ao-PRO

N I R A T Y K L T P  
N I Q A T Y S L T C

Gd-DNA CT GAC CGA ACC ATG CTT GTC ATG CCT CTT TTC CAC GTC CAC GGC CTT CTC GCC GGG CTC  
Gp-DNA CT GAC CGA ACC ATG CTC GTC ATG CCT CTT TTC CAC GTC CAC GGC CTT CTT GCC GGG TTC  
Ac-DNA AG GAT CGC ACC TAC TTG GTG ATG CCT CTA TTC CAC GTC CAC GGC CTG TTG GCC GGA TTC  
Ao-DNA AT GAC CGA ACT TAT CTT GTT ATG CCG CTC TTC CAC GTC CAC GGC CTT CTC GCC GCT TTC  
Gd-PRO A D R T M L V M P L F H V H G L L A G L  
Gp-PRO A D R T M L V M P L F H V H G L L A G F  
Ac-PRO E D R T Y L V M P L F H V H G L L A G F  
Ao-PRO N D R T Y L V M P L F H V H G L L A A F

Gd-DNA CTC GCC CCT CTT CTT TCC GGA GGC TCT GTC GTT GTC CCT GCC AAG TTC AGC GCC ACT ACC  
Gp-DNA CTT GCC CCT CTA CTT TCC GGA GGG TCC GTC GTT GTC CCT GCC AAG TTC AGC GCC ACT ACT  
Ac-DNA CTC GCC CCC CTT TTG TCT GGA GGC TCC GTA ATT GTG CCT CCC AGA TTC TCC GCA TCG GAG  
Ao-DNA CTC GCC CCG TTA CAG TCT GGA GGG TCC GTC GTT GTG CCT CCC AAG TTC TCT GCT ACC GAT  
Gd-PRO L A P L L S G G S V V V P A K F S A T T  
Gp-PRO L A P L L S G G S V V V P A K F S A T T  
Ac-PRO L A P L L S G G S V T V P P R F S A S E  
Ao-PRO L A P L Q S G G S V V V P P K F S A T D

Gd-DNA TTC TGG GAG GAT TTC ATC ACG CAT AAA GCC AAC TGG TAC ACT GCT GTG CCC ACC ATC CAC  
Gp-DNA TTC TGG GAA GAC TTT ATC AAT TAT AAA GCT AAC TGG TAC ACT GCT GTG CCC ACC ATC CAC  
Ac-DNA TTC TGG GCG GAT TTC GTT GGA TTC CAC GCG AAC TGG TAC ACA GCT GTG CCT ACG ATC CAT  
Ao-DNA TTC TGG TCG GAT TTC ATC ACG TAC AAG GCC AAC TGG TAT ACG GCG GTG CCG ACC ATA CAC  
Gd-PRO F W E D F I T H K A N W Y T A V P T I H  
Gp-PRO F W E D F I N Y K A N W Y T A V P T I H  
Ac-PRO F W A D F V G F H A N W Y T A V P T I H  
Ao-PRO F W S D F I T Y K A N W Y T A V P T I H

Gd-DNA CAG ATT CTC CTC AGA AAC CCT CCT CCG TCC ACC AAG CCC AAC ATT CGA TTC ATT CGC TCT  
Gp-DNA CAG ATC CTT CTC AGA AAC CCA CCC CCG TCA GCC AAA CCT AAC ATT CGA TTT ATC CGG TCC  
Ac-DNA CAG ATC CTC CTT AAG ACA CCG CTG CCG AAC CCC ATT CCC AAG ATC CGG TTC ATT CGC TCA  
Ao-DNA CAG ATC CTA CTC AAG CAT CCA TTC CCA TCT CCC ATG CCA AAG ATC CGT TTC GTC CGC TCT  
Gd-PRO Q I L L R N P P P S T K P N I R F I R S  
Gp-PRO Q I L L R N P P P S A K P N I R F I R S  
Ac-PRO Q I L L K T P L P N P T P K I R F I R S  
Ao-PRO Q I L L K H P F P S P M P K I R F V R S

|        |     |     |     |     |     |     |     |     |     |     |     |     |     |     |     |     |     |     |     |     |
|--------|-----|-----|-----|-----|-----|-----|-----|-----|-----|-----|-----|-----|-----|-----|-----|-----|-----|-----|-----|-----|
| Gd-DNA | TGC | TCG | TCG | CCT | CTT | TCG | CCA | ACA | ACC | TTC | CAC | CAG | CTT | GAG | GAG | CAG | TAC | AAT | GCC | CCT |
| Gp-DNA | TGC | TCG | TCT | CCT | TTA | TCG | CCA | ACA | ACC | TTT | TAC | CAA | CTC | CAG | GAG | CAG | TAC | AAT | GCT | CCT |
| Ac-DNA | TGC | TCA | TCG | CCG | CTG | TCG | CCA | AAG | ACT | TTC | GAG | GAT | CTG | GAA | AAG | ACG | TTC | AAG | GCC | CCC |
| Ao-DNA | TGC | TCG | TCA | CCG | CTG | TCT | CCC | AAG | ACA | TTC | CAC | GAA | ATA | GAA | CGT | GCA | TTC | AAT | GCT | CCG |
| Gd-PRO | C   | S   | S   | P   | L   | S   | P   | T   | T   | F   | H   | Q   | L   | E   | E   | Q   | Y   | N   | A   | P   |
| Gp-PRO | C   | S   | S   | P   | L   | S   | P   | T   | T   | F   | Y   | Q   | L   | Q   | E   | Q   | Y   | N   | A   | P   |
| Ac-PRO | C   | S   | S   | P   | L   | S   | P   | K   | T   | F   | E   | D   | L   | E   | K   | T   | F   | K   | A   | P   |
| Ao-PRO | C   | S   | S   | P   | L   | S   | P   | K   | T   | F   | H   | E   | I   | E   | R   | A   | F   | N   | A   | P   |

|        |     |     |     |     |     |     |     |     |     |     |     |     |     |     |     |     |     |     |     |     |     |
|--------|-----|-----|-----|-----|-----|-----|-----|-----|-----|-----|-----|-----|-----|-----|-----|-----|-----|-----|-----|-----|-----|
| Gd-DNA | GTT | CTC | GAG | GCA | TAT | GCC | ATG | ACT | GAA | GCC | GCC | CAT | CAA | ATG | ACA | TCC | AGC | CCT | CTC | CCA | 484 |
| Gp-DNA | GTC | CTC | GAG | GCA | TAT | GCC | ATG | ACG | GAA | GCT | GCC | CAC | CAA | ATG | ACC | TCC | AAC | CCA | CTT | CCA | 478 |
| Ac-DNA | GTC | CTG | GAA | GCG | TAC | GCG | ATG | ACC | GAG | GCT | TCG | CAC | CAG | ATG | ACC | AGC | AAC | CCT | CTC | CCG | 486 |
| Ao-DNA | GTT | CTC | GAA | GCA | TAT | GCC | ATG | ACC | GAA | GCC | TCA | CAT | CAA | ATG | ACA | AGC | AAC | CCT | CTA | CCG | 488 |
| Gd-PRO | V   | L   | E   | A   | Y   | A   | M   | T   | E   | A   | A   | H   | Q   | M   | T   | S   | S   | P   | L   | P   |     |
| Gp-PRO | V   | L   | E   | A   | Y   | A   | M   | T   | E   | A   | A   | H   | Q   | M   | T   | S   | N   | P   | L   | P   |     |
| Ac-PRO | V   | L   | E   | A   | Y   | A   | M   | T   | E   | A   | S   | H   | Q   | M   | T   | S   | N   | P   | L   | P   |     |
| Ao-PRO | V   | L   | E   | A   | Y   | A   | M   | T   | E   | A   | S   | H   | Q   | M   | T   | S   | N   | P   | L   | P   |     |

POB3 (FACT complex subunit): ~400 bases aligned; The alignment starts with non-coding miscellaneous feature (Va = *Verticillium albo-atrum*, Gg = *Glomerella graminicola*)

|        |                                             |     |     |     |     |     |    |
|--------|---------------------------------------------|-----|-----|-----|-----|-----|----|
| Gd-DNA | --CAATTGGCGCA-----CCCTCTAACCT-ATG-----TA    | CAG | GAC | --- | TTC | GAC | CG |
| Gp-DNA | --CGATTGGCGCA-----CCTTCTAACGT-ATG-----TA    | CAG | GAC | --- | TTC | GAC | CG |
| Va-DNA | CGCGACACCCGCA-----TCATCCAGCTCGACGGCTTCC-CG  | CAG | GAC | GAG | TTC | GAG | CG |
| Gg-DNA | CCCAGTAAGTGGGGGAAGCCGAGCTAATTGAACACCCGGCGTG | CAG | GAC | --- | TAC | GAG | CG |
| Gd-PRO |                                             | Q   | D   | -   | F   | D   | R  |
| Gp-PRO |                                             | Q   | D   | -   | F   | D   | R  |
| Va-PRO |                                             | Q   | D   | E   | F   | E   | R  |
| Gg-PRO |                                             | Q   | D   | -   | Y   | E   | R  |

|        |   |     |     |     |     |     |     |     |     |     |     |     |     |     |     |     |     |     |     |     |    |
|--------|---|-----|-----|-----|-----|-----|-----|-----|-----|-----|-----|-----|-----|-----|-----|-----|-----|-----|-----|-----|----|
| Gd-DNA | C | CTG | ACG | AAA | GTA | TTC | AAG | AAC | TGG | TAC | AGC | ACG | AAC | CTC | GAG | ACG | AAG | GAG | CAC | GCA | TT |
| Gp-DNA | C | CTG | ACG | AAA | GTG | TTC | AAG | AAC | TGG | TAC | AGC | ACG | AAC | CTC | GAG | ACG | AAG | GAA | CAC | GCA | TT |
| Va-DNA | C | CTG | TCG | AAG | CTC | TTC | AAA | AAC | TGG | TAC | AGC | ACG | ACC | CTC | GAG | AAC | AAG | GAG | CAC | GCC | CT |
| Gg-DNA | C | CTC | GCA | AAG | ATT | TTC | AAG | AAT | TGG | TAC | AGC | ACC | GCC | CTC | GAG | AAT | AAG | GAG | CAC | GCC | CT |
| Gd-PRO |   | L   | T   | K   | V   | F   | K   | N   | W   | Y   | S   | T   | N   | L   | E   | T   | K   | E   | H   | A   | L  |

|        |   |   |   |   |   |   |   |   |   |   |   |   |   |   |   |   |   |   |   |   |
|--------|---|---|---|---|---|---|---|---|---|---|---|---|---|---|---|---|---|---|---|---|
| Gp-PRO | L | T | K | V | F | K | N | W | Y | S | T | N | L | E | T | K | E | H | A | L |
| Va-PRO | L | S | K | L | F | K | N | W | Y | S | T | T | L | E | N | K | E | H | A | L |
| Gg-PRO | L | A | K | I | F | K | N | W | Y | S | T | A | L | E | N | K | E | H | A | L |

|        |   |     |     |     |     |     |     |     |     |     |     |     |     |     |     |     |     |     |     |     |    |
|--------|---|-----|-----|-----|-----|-----|-----|-----|-----|-----|-----|-----|-----|-----|-----|-----|-----|-----|-----|-----|----|
| Gd-DNA | A | CGA | GGA | TGG | AAC | TGG | GGC | AAG | GCG | GAA | TTC | GGA | AAG | GCG | GAA | TTG | GCA | TTC | AAC | GTG | CA |
| Gp-DNA | A | CGA | GGA | TGG | AAC | TGG | GGG | AAA | GCG | GAG | TTC | GGA | AAG | GCG | GAG | CTG | GCA | TTC | AAT | GTG | CA |
| Va-DNA | G | CGC | GGC | TGG | AAC | TGG | GGC | AAG | GCG | GAG | TTC | GGC | AAG | GCT | GAG | CTG | TCC | TTC | AAC | GTG | CA |
| Gg-DNA | G | AGA | GGA | TGG | AAC | TGG | GGC | AAG | GCC | GAA | TTC | GGA | AAG | GCC | GAG | CTT | TCC | TTC | AAC | GTC | CA |
| Gd-PRO | R | G   | W   | N   | W   | G   | K   | A   | E   | F   | G   | K   | A   | E   | L   | A   | F   | N   | V   | Q   |    |
| Gp-PRO | R | G   | W   | N   | W   | G   | K   | A   | E   | F   | G   | K   | A   | E   | L   | A   | F   | N   | V   | Q   |    |
| Va-PRO | R | G   | W   | N   | W   | G   | K   | A   | E   | F   | G   | K   | A   | E   | L   | S   | F   | N   | V   | Q   |    |
| Gg-PRO | R | G   | W   | N   | W   | G   | K   | A   | E   | F   | G   | K   | A   | E   | L   | S   | F   | N   | V   | Q   |    |

|        |   |     |     |     |     |     |     |     |     |     |     |     |     |     |     |     |     |     |     |     |    |
|--------|---|-----|-----|-----|-----|-----|-----|-----|-----|-----|-----|-----|-----|-----|-----|-----|-----|-----|-----|-----|----|
| Gd-DNA | G | AAC | AGA | CCT | GCG | TTT | GAG | ATC | CCC | TAC | TCG | GAG | ATC | TCG | AAT | ACG | AAT | TTG | GCT | GGG | AA |
| Gp-DNA | G | AAC | AGA | CCT | GCG | TTT | GAA | ATT | CCT | TAC | TCG | GAG | ATC | TCG | AAT | ACG | AAT | TTG | GCT | GGA | AA |
| Va-DNA | G | AAT | CGT | CCG | GCC | TTT | GAG | GTG | CCC | TAC | TCG | GAA | ATC | TCC | AAC | ACC | AAC | CTC | GCT | GGC | CG |
| Gg-DNA | G | AAC | CGA | CCT | GCT | TTT | GAA | ATC | CCT | TAC | TCC | GAG | ATC | TCA | AAT | ACC | AAC | CTG | GCA | GGT | CG |
| Gd-PRO | N | R   | P   | A   | F   | E   | I   | P   | Y   | S   | E   | I   | S   | N   | T   | N   | L   | A   | G   | K   |    |
| Gp-PRO | N | R   | P   | A   | F   | E   | I   | P   | Y   | S   | E   | I   | S   | N   | T   | N   | L   | A   | G   | K   |    |
| Va-PRO | N | R   | P   | A   | F   | E   | V   | P   | Y   | S   | E   | I   | S   | N   | T   | N   | L   | A   | G   | R   |    |
| Gg-PRO | N | R   | P   | A   | F   | E   | I   | P   | Y   | S   | E   | I   | S   | N   | T   | N   | L   | A   | G   | R   |    |

|        |   |     |     |     |     |     |     |     |     |     |     |     |     |     |     |     |     |     |     |     |   |
|--------|---|-----|-----|-----|-----|-----|-----|-----|-----|-----|-----|-----|-----|-----|-----|-----|-----|-----|-----|-----|---|
| Gd-DNA | G | AAC | GAG | GTG | GCG | GTT | GAG | TTC | TCG | TTG | CCG | GCT | GGT | --- | GGC | GAT | GAG | GGC | GCA | AAC | G |
| Gp-DNA | G | AAC | GAG | GTG | GCA | GTC | GAG | TTT | TCG | TTG | CCG | GCG | GGT | --- | GGC | GAC | GAG | GGC | GCA | AAC | G |
| Va-DNA | C | AAC | GAG | GTC | GCC | GTC | GAG | TTT | GCC | GCC | CCC | ACC | GAC | GAG | AAC | GAC | ACA | GGC | ACC | AAC | G |
| Gg-DNA | C | AAC | GAA | GTC | GCC | GTC | GAA | TTC | TCT | GCC | CCG | ACG | GAC | CAG | AAC | GAT | ACC | GGC | ACG | AAT | G |
| Gd-PRO | N | E   | V   | A   | V   | E   | F   | S   | L   | P   | A   | G   | -   | G   | D   | E   | G   | A   | N   |     |   |
| Gp-PRO | N | E   | V   | A   | V   | E   | F   | S   | L   | P   | A   | G   | -   | G   | D   | E   | G   | A   | N   |     |   |
| Va-PRO | N | E   | V   | A   | V   | E   | F   | A   | A   | P   | T   | D   | E   | N   | D   | T   | G   | T   | N   |     |   |
| Gg-PRO | N | E   | V   | A   | V   | E   | F   | S   | A   | P   | T   | D   | Q   | N   | D   | T   | G   | T   | N   |     |   |

|        |    |     |     |     |     |     |     |     |     |     |     |     |     |     |     |     |     |     |     |     |   |     |
|--------|----|-----|-----|-----|-----|-----|-----|-----|-----|-----|-----|-----|-----|-----|-----|-----|-----|-----|-----|-----|---|-----|
| Gd-DNA | GA | AGC | TTG | GGT | GGT | GCG | AAG | GGG | AAG | GGG | AAG | AAG | GCT | GGC | GCG | GGG | AAG | GAT | CAG | TTG | G | 359 |
| Gp-DNA | GA | AGC | TTG | GGC | GGT | GCG | AAG | GGG | AAG | GGC | AAG | AAG | GCC | GGC | GCA | GGG | AAG | GAT | CAA | TTA | G | 393 |
| Va-DNA | GG | ACT | CTC | GAC | GGT | GCG | CGT | GGC | AAG | GGC | AAG | AAG | GCG | GGT | GCT | GGC | AAG | GAC | CAG | CTC | G | 459 |
| Gg-DNA | GC | CAC | TTG | GGC | GGC | GCG | CGA | GGA | AAG | GGC | AAG | AAG | GCC | GGA | GCC | GGC | AAA | GAT | CAG | CTC | G | 465 |
| Gd-PRO | G  | S   | L   | G   | G   | A   | K   | G   | K   | G   | K   | K   | A   | G   | A   | G   | K   | D   | Q   | L   |   |     |
| Gp-PRO | G  | S   | L   | G   | G   | A   | K   | G   | K   | G   | K   | K   | A   | G   | A   | G   | K   | D   | Q   | L   |   |     |
| Va-PRO | G  | T   | L   | D   | G   | A   | R   | G   | K   | G   | K   | K   | A   | G   | A   | G   | K   | D   | Q   | L   |   |     |

Gg-PRO G **H** L G G A R G K G K K A G A G K D Q L

SRP72 (Signal recognition particle protein 72): ~400 bases aligned; Region shown include 5' UTR and 5' region of the protein (Ss = *Sclerotinia sclerotiorum*, Ad = *Ajellomyces dermatiditis*)

Gd-DNA CTAAATATACATATACATGGAATGAAACATATGCCGCGCATATAATACATATGATATCAGCTTACTCAAGTGCGCCCAAT  
 Ss-DNA GCCGCGCTAGCTCAGCAGTTGATCGCTTTTTGACACCATCTCCATATCGCATGGCTACAGTAAATAGGAACCCATCGCCCTA  
 Gp-DNA GGAGATATACATACACATGGACTGAAATATATATGGCCTCGCATATAATCAACATATCAGTTTACTCAAGTGCGCCTAATA  
 Ad-DNA TTATTCCGCAACCTTCTTTCTTTTTTATTTCTTTAAACAATCCTTTTTCGGGAGCCAGTGCGGCGCCTGAACAGCCCTTGAA

Gd-DNA CTC GCT AGC ATG GCG TCC AAC CCC ACC GCT ACG TTG AGC AAA CTA CTC GGC TCA GCA ACT A  
 Ss-DNA GAG TTT AAA ATG GCC --- GAT CAA ACA GCA ACG CTC AGC GCC CTC CTT CGT AAT TCT TCA A  
 Gp-DNA CTC GCT AGC ATG GCG TCC AAC CCC ACC GCT ACC TTG AGC AAA CTC CTC GGC TCA GCA ACT A  
 Ad-DNA CTT CTC CGT ATG GCG --- --- --- ACC CAG AGC ATC AGT GCG TTG GTT CAG CGA AGC ACA A  
 Gd-PRO M A S N P T A T L S K L L G S A T  
 Ss-PRO M A - D Q T A T L S **A** L L **R** **N** **S** **S**  
 Gp-PRO M A S N P T A T L S K L L G S A T  
 Ad-PRO M A - - - T **Q** **S** I S **A** L **V** **Q** **R** **S** T

Gd-DNA TG GAG GAC CAT GAG GAG ATT CTG AGA GCC GCC AAT GCC GTT CTC AAG AAG TCG AAA ACA A  
 Ss-DNA TT ACA GAC CAT GAA GAG ATC CTC AAA GCT ACA AAT GAC GTA TTA AAG ACT TCT AAA CTC G  
 Gp-DNA TC GAT GAC CAC GAG GAG GTT CTG AGA GCC GCC AAT GCT ATT CTC AAG AAG TCG AAA ACA G  
 Ad-DNA TC GAC GAC CAT GAA GAA GTC ATC AAA GCT TGC AAT GCG GTA CTG AAA ACG TCC AAA AAC G  
 Gd-PRO **M** **E** D H E E I L R A A N A V L K K S K T  
 Ss-PRO I **T** D H E E I L **K** A **T** N **D** V L K **T** S K **L**  
 Gp-PRO I D D H E E **V** L R A A N A **I** L K K S K T  
 Ad-PRO I D D H E E **V** **I** K A **C** N A V L K **T** S K **N**

Gd-DNA AC CAG GAT GCG CTG CGT ACT CGC GTT ATT GCA CTC CTC AAG CTA GAC CGC TAC GCA GAT G  
 Ss-DNA AC CCC GAT GCC TTG CAT ACC CGC GCT ATT GCT CTC CTC AAA CTT GAT CGA TTC GAC GAT G  
 Gp-DNA AC CAG GAT GCG CTA CGT ACT CGT GTC ATT GCG CTG CTT AAG CTA GAC CGC TAC GCA GAT G  
 Ad-DNA AT CTC AAT GCC CTC CAT GTA AAA ACT GTT GCC CTG GTC AAA TTG GAC CGT TTC GAA GAT G  
 Gd-PRO **N** Q D A L R T R V I A L L K L D R Y A D  
 Ss-PRO D **P** D A L **H** T R **A** I A L L K L D R **F** **D** D  
 Gp-PRO D Q D A L R T R V I A L L K L D R Y A D  
 Ad-PRO D **L** **N** A L **H** **V** **K** **T** **V** A L **V** K L D R **F** **E** D

|        |    |     |     |     |     |     |     |     |     |     |     |     |     |     |     |     |     |     |
|--------|----|-----|-----|-----|-----|-----|-----|-----|-----|-----|-----|-----|-----|-----|-----|-----|-----|-----|
| Gd-DNA | CC | CTC | CGC | GCC | CTC | GAC | GAC | GGG | GGC | GAA | GCT | CTC | AGC | GAA | AGC | TGC | CAC | GTT |
| Ss-DNA | CA | CTA | AAA | GCC | CTC | GAC | GAA | GGT | GGA | GAT | AAA | TTG | GCT | TCT | CAA | TGT | ATT | CTC |
| Gp-DNA | CT | CTC | CGC | GCC | CTC | GAC | GAC | GGG | GGA | GAT | GCT | CTC | AGC | GAA | ATC | TGC | CAC | GTT |
| Ad-DNA | CG | ATT | CGA | GTG | ATC | GAG | GAT | GGC | GGG | GAT | GCG | CTG | AAA | AAG | AAA | GTC | CCT | CTG |
| Gd-PRO | A  | L   | R   | A   | L   | D   | D   | G   | G   | E   | A   | L   | S   | E   | S   | C   | H   | V   |
| Ss-PRO | A  | L   | K   | A   | L   | D   | E   | G   | G   | D   | K   | L   | A   | S   | Q   | C   | I   | L   |
| Gp-PRO | A  | L   | R   | A   | L   | D   | D   | G   | G   | D   | A   | L   | S   | E   | I   | C   | H   | V   |
| Ad-PRO | A  | I   | R   | V   | I   | E   | D   | G   | G   | D   | A   | L   | K   | K   | K   | V   | P   | L   |

|        |     |     |     |     |     |     |     |     |     |     |     |     |     |     |     |     |     |     |     |   |
|--------|-----|-----|-----|-----|-----|-----|-----|-----|-----|-----|-----|-----|-----|-----|-----|-----|-----|-----|-----|---|
| Gd-DNA | GAG | AAG | TCG | TAC | GCC | CTT | TAC | AAA | ACA | GGC | CAG | CTC | GAG | GCC | GCA | CAG | AAG | ATT | TTC | G |
| Ss-DNA | GAA | CGC | GCT | TAT | GCT | CTC | TAC | AAG | ACA | GGG | AAA | CTG | GCA | GAT | GCG | GCG | AAA | GTA | TGT | G |
| Gp-DNA | GAG | AAA | TCG | TAC | GCG | CTT | TAC | AAA | ACA | GGC | CAA | CTC | GAG | GCC | GCA | CAG | AAA | ATT | TTC | G |
| Ad-DNA | GAA | TGG | TCT | TAC | GCT | TTA | TAT | AAG | GTC | GGG | CAA | TTA | GAA | GAT | GCG | ATA | AAA | CTG | GCC | G |
| Gd-PRO | E   | K   | S   | Y   | A   | L   | Y   | K   | T   | G   | Q   | L   | E   | A   | A   | Q   | K   | I   | F   |   |
| Ss-PRO | E   | R   | A   | Y   | A   | L   | Y   | K   | T   | G   | K   | L   | A   | D   | A   | A   | K   | V   | C   |   |
| Gp-PRO | E   | K   | S   | Y   | A   | L   | Y   | K   | T   | G   | Q   | L   | E   | A   | A   | Q   | K   | I   | F   |   |
| Ad-PRO | E   | W   | S   | Y   | A   | L   | Y   | K   | V   | G   | Q   | L   | E   | D   | A   | I   | K   | L   | A   |   |

VPS13 (Vacuolar protein sorting-associated protein): ~545 bases aligned (Ss = *Sclerotinia sclerotiorum*, Bf = *Botryotinia fuckeliana*)

|        |    |     |     |     |     |     |     |     |     |     |     |     |     |     |     |     |     |     |     |     |   |
|--------|----|-----|-----|-----|-----|-----|-----|-----|-----|-----|-----|-----|-----|-----|-----|-----|-----|-----|-----|-----|---|
| Gd-DNA | GG | ATC | CCA | GAT | AGT | GGT | GGA | GCG | TTT | AGA | CTC | ACG | ATT | TAC | AGT | CCT | TAC | ATC | ATT | TTG | A |
| Gp-DNA | GA | ATC | CCA | GAC | GGC | GGT | GGA | GCG | TTT | AGA | CTC | ACA | ATT | TAC | AGT | CCT | TAT | GTC | ATT | TTG | A |
| Ss-DNA | AG | ATT | CCA | GAT | AGT | GGA | GGA | GCA | TTT | AGA | GTA | ACT | GTC | TAC | AGT | CCT | TAC | GTT | ATC | CTA | A |
| Bf-DNA | AG | ATT | CCA | GAT | AGT | GGT | GGA | GCT | TTT | AGA | GTC | ACC | GTA | TAC | AGT | CCT | TAT | GTA | ATC | CTA | A |
| Gd-PRO |    | I   | P   | D   | S   | G   | G   | A   | F   | R   | L   | T   | I   | Y   | S   | P   | Y   | I   | I   | L   |   |
| Gp-PRO |    | I   | P   | D   | G   | G   | A   | F   | R   | L   | T   | I   | Y   | S   | P   | Y   | V   | V   | I   | L   |   |
| Ss-PRO |    | I   | P   | D   | S   | G   | G   | A   | F   | R   | V   | T   | V   | Y   | S   | P   | Y   | V   | I   | L   |   |
| Bf-PRO |    | I   | P   | D   | S   | G   | G   | A   | F   | R   | V   | T   | V   | Y   | S   | P   | Y   | V   | I   | L   |   |

|        |    |     |     |     |     |     |     |     |     |     |     |     |     |     |     |     |     |     |     |     |   |
|--------|----|-----|-----|-----|-----|-----|-----|-----|-----|-----|-----|-----|-----|-----|-----|-----|-----|-----|-----|-----|---|
| Gd-DNA | AT | AAA | ACT | GGC | CTG | GAT | ATC | AAT | ATC | AAG | GCC | AAG | TCG | TTA | CTG | CAG | CAA | GCA | CGG | ACG | G |
| Gp-DNA | AT | AAA | ACA | GGC | CTG | GAT | ATC | AAC | ATC | AAG | GCG | AAG | TCG | TTA | CTG | CAG | CAA | GCG | CGG | ACT | G |
| Ss-DNA | AT | AAA | ACC | GGA | CTG | GAG | ATC | AAC | ATC | AAA | CAG | AAG | TCA | TTG | TTG | CAG | CAA | GCA | AAG | ACG | G |
| Bf-DNA | AT | AAG | ACT | GGC | CTA | GAG | ATC | AAC | ATC | AAA | CAA | AAA | TCG | CTA | TTG | CAG | CAA | GCA | AAG | ACG | G |
| Gd-PRO | N  | K   | T   | G   | L   | D   | I   | N   | I   | K   | A   | K   | S   | L   | L   | Q   | Q   | A   | R   | T   |   |
| Gp-PRO | N  | K   | T   | G   | L   | D   | I   | N   | I   | K   | A   | K   | S   | L   | L   | Q   | Q   | A   | R   | T   |   |



|        |    |     |     |     |     |     |     |     |     |     |     |     |     |     |     |     |     |     |     |     |   |
|--------|----|-----|-----|-----|-----|-----|-----|-----|-----|-----|-----|-----|-----|-----|-----|-----|-----|-----|-----|-----|---|
| Ss-PRO | N  | K   | T   | G   | L   | E   | I   | N   | I   | K   | Q   | K   | S   | L   | L   | Q   | Q   | A   | K   | T   |   |
| Bf-PRO | N  | K   | T   | G   | L   | E   | I   | N   | I   | K   | Q   | K   | S   | L   | L   | Q   | Q   | A   | K   | T   |   |
| Gd-DNA | CG | GCT | GGC | CAG | AAG | GTA | GTG | CGC | GAT | CTC | CTT | GGG | GAT | GAC | GAA | CAG | AAG | GCG | CTG | CCT | C |
| Gp-DNA | CA | GCT | GGA | CAG | AAG | GTC | GTG | CGC | GAT | CTC | CTC | AGC | GAT | GAC | GAG | CAG | AAG | GCG | CTG | CCT | T |
| Ss-DNA | CG | GCC | GGT | CAA | GGG | TTT | CGT | ACA | GAT | TCG | GCT | GAT | TCA | GAA | CGG | CGT | AAG | GCA | CTA | CCT | T |
| Bf-DNA | CA | GCA | GGT | CAA | GGG | TTC | CAT | ACT | GAC | TCA | GTC | GAT | TCT | GAA | CGG | CGC | AAA | GCA | CTA | CCA | T |
| Gd-PRO | A  | A   | G   | Q   | K   | V   | V   | R   | D   | L   | L   | G   | D   | D   | E   | Q   | K   | A   | L   | P   |   |
| Gp-PRO | A  | A   | G   | Q   | K   | V   | V   | R   | D   | L   | L   | S   | D   | D   | E   | Q   | K   | A   | L   | P   |   |
| Ss-PRO | A  | A   | G   | Q   | G   | F   | R   | T   | D   | S   | A   | D   | S   | E   | R   | R   | K   | A   | L   | P   |   |
| Bf-PRO | A  | A   | G   | Q   | G   | F   | H   | T   | D   | S   | V   | D   | S   | E   | R   | R   | K   | A   | L   | P   |   |
| Gd-DNA | TG | ATG | TTT | GCG | TTC | AGT | GGC | GAC | GAC | CAG | CGC | AAC | CGC | GTC | ATC | CTC | AAA | GTC | GGC | GAG | T |
| Gp-DNA | TG | ATG | TTT | GCG | TTC | AGT | GGC | GAC | GAC | CAG | CGT | AAC | CGC | GTC | ATC | CTC | AAA | GTT | GGC | GAG | T |
| Ss-DNA | AT | ATG | TTC | GCA | TAT | GGC | GGA | GAT | GAT | CAA | AGG | AAT | CGT | GCT | ATA | TTG | AAG | GTT | GGC | GAC | T |
| Bf-DNA | AC | ATG | TTC | GCG | TAT | GGC | GGA | GAT | GAT | CAA | CGA | AAT | CGT | GCT | TTA | ATG | AAG | GTC | GGT | GAC | T |
| Gd-PRO | L  | M   | F   | A   | F   | S   | G   | D   | D   | Q   | R   | N   | R   | V   | I   | L   | K   | V   | G   | E   |   |
| Gp-PRO | L  | M   | F   | A   | F   | S   | G   | D   | D   | Q   | R   | N   | R   | V   | I   | L   | K   | V   | G   | E   |   |
| Ss-PRO | Y  | M   | F   | A   | Y   | G   | G   | D   | D   | Q   | R   | N   | R   | A   | I   | L   | K   | V   | G   | D   |   |
| Bf-PRO | Y  | M   | F   | A   | Y   | G   | G   | D   | D   | Q   | R   | N   | R   | A   | L   | M   | K   | V   | G   | D   |   |
| Gd-DNA | CG | AAC | TGG | AGT | AAA | CCG | CAG | AGT | TTC | GAC | GCC | ATT | GGC | AGC | ACA | ATC | GAT | GTG | GTT | CTA | C |
| Gp-DNA | CG | AAC | TGG | AGT | AAA | CCG | CAG | AGT | TTC | GAC | GCC | ATT | GGC | AGC | ACG | ATT | GAT | GTT | GTT | CTA | C |
| Ss-DNA | CG | AAT | TGG | AGT | AAA | CCA | CAA | AGT | CTG | GAT | GCC | ATC | GGT | AGT | AAT | GTC | GAT | GTT | GTT | TTA | T |
| Bf-DNA | CC | AAC | TGG | AGT | AAA | CCG | CAA | AGT | TTG | GAT | GCT | ATC | GGC | AGC | AAT | GTA | GAT | GTC | ATA | TTG | C |
| Gd-PRO | S  | N   | W   | S   | K   | P   | Q   | S   | F   | D   | A   | I   | G   | S   | T   | I   | D   | V   | V   | L   |   |
| Gp-PRO | S  | N   | W   | S   | K   | P   | Q   | S   | F   | D   | A   | I   | G   | S   | T   | I   | D   | V   | V   | L   |   |
| Ss-PRO | S  | N   | W   | S   | K   | P   | Q   | S   | L   | D   | A   | I   | G   | S   | N   | V   | D   | V   | V   | L   |   |
| Bf-PRO | S  | N   | W   | S   | K   | P   | Q   | S   | L   | D   | A   | I   | G   | S   | N   | V   | D   | V   | I   | L   |   |
| Gd-DNA | CG | TCA | GCA | ACT | CAG | AAT | ACT | GAG | ATC | CAT | GTT | GGA | ATC | AGC | ATC | GAG | AAT | GGA | GAC | GGG | A |
| Gp-DNA | CC | TCG | GCA | ACT | CAG | AAT | ACC | GAG | ATA | CAC | GTT | GGA | ATC | AGT | ATC | GAG | AAC | GGG | GAC | GGG | A |
| Ss-DNA | CT | TCT | TCT | AAA | AAC | AAC | ACC | GAG | ATA | CAC | GTG | GGC | ATC | AAT | GTT | GAA | TCA | GGA | GAG | GGC | A |
| Bf-DNA | CT | TCC | TCA | AAG | AAC | AAT | ACC | GAA | ATT | CAT | GTA | GGT | ATC | AGT | GTC | GAA | GCA | GGA | GAG | GGT | A |
| Gd-PRO | P  | S   | A   | T   | Q   | N   | T   | E   | I   | H   | V   | G   | I   | S   | I   | E   | N   | G   | D   | G   |   |
| Gp-PRO | P  | S   | A   | T   | Q   | N   | T   | E   | I   | H   | V   | G   | I   | S   | I   | E   | N   | G   | D   | G   |   |
| Ss-PRO | S  | S   | S   | K   | N   | N   | T   | E   | I   | H   | V   | G   | I   | N   | V   | E   | S   | G   | E   | G   |   |

|        |    |     |     |     |     |     |     |     |     |     |     |     |     |     |     |     |     |     |     |     |   |
|--------|----|-----|-----|-----|-----|-----|-----|-----|-----|-----|-----|-----|-----|-----|-----|-----|-----|-----|-----|-----|---|
| Bf-PRO | P  | S   | S   | K   | N   | N   | T   | E   | I   | H   | V   | G   | I   | S   | V   | E   | A   | G   | E   | G   |   |
| Gd-DNA | AA | TAC | AAG | ATG | ACC | AAG | GTC | GTT | ACG | CTT | GCG | CCG | AGA | TTT | GTG | CTG | AAG | AAT | CGC | ATG | A |
| Gp-DNA | AA | TAC | AAG | ATG | ACC | AAG | GTC | GTT | ACG | CTT | GCA | CCG | AGA | TTT | GTG | CTG | AAG | AAT | CGC | ATG | A |
| Ss-DNA | AA | TAC | AAA | ATG | ACG | AAG | GTA | GTC | ACT | CTT | GCT | CCC | CGC | TTT | GTT | CTG | AAG | AAT | CAG | ATG | A |
| Bf-DNA | AA | TAT | AAG | ATG | ACG | AAG | GTT | GTC | ACA | CTT | GCT | CCT | CGC | TTT | GTT | TTA | AAG | AAT | CAA | ATG | A |
| Gd-PRO | K  | Y   | K   | M   | T   | K   | V   | V   | T   | L   | A   | P   | R   | F   | V   | L   | K   | N   | R   | M   |   |
| Gp-PRO | K  | Y   | K   | M   | T   | K   | V   | V   | T   | L   | A   | P   | R   | F   | V   | L   | K   | N   | R   | M   |   |
| Ss-PRO | K  | Y   | K   | M   | T   | K   | V   | V   | T   | L   | A   | P   | R   | F   | V   | L   | K   | N   | Q   | M   |   |
| Bf-PRO | K  | Y   | K   | M   | T   | K   | V   | V   | T   | L   | A   | P   | R   | F   | V   | L   | K   | N   | Q   | M   |   |
|        |    |     |     |     |     |     |     |     |     |     |     |     |     |     |     |     |     |     |     |     |   |
| Gd-DNA | GC | GAG | GAA | ATC | AGC | GCC | AGG | GAA | CCT | GGA | TCG | TCG | GAG | CTT | ATG | ACT | TTG | AAG | CGG | GGA | G |
| Gp-DNA | GT | GAG | GAA | ATC | AGC | GCC | AGG | GAA | CCT | GGA | TCG | TCG | GAG | CTC | ATG | ACT | TTG | AAG | CCG | GGA | G |
| Ss-DNA | AC | GAG | GAA | ATA | AAT | GTC | AGG | GAA | CCC | GGG | TCG | TCT | GAA | CTC | TGG | ACT | TTG | AAG | CCA | CAG | G |
| Bf-DNA | GC | GAA | GAA | CTA | AAC | GTT | AGA | GAG | CCT | GGG | TCA | TCT | GAA | CTT | TGG | ACT | TTG | AAG | CCA | CAA | G |
| Gd-PRO | S  | E   | E   | I   | S   | A   | R   | E   | P   | G   | S   | S   | E   | L   | M   | T   | L   | K   | R   | G   |   |
| Gp-PRO | S  | E   | E   | I   | S   | A   | R   | E   | P   | G   | S   | S   | E   | L   | M   | T   | L   | K   | P   | G   |   |
| Ss-PRO | N  | E   | E   | I   | N   | V   | R   | E   | P   | G   | S   | S   | E   | L   | W   | T   | L   | K   | P   | Q   |   |
| Bf-PRO | S  | E   | E   | L   | N   | V   | R   | E   | P   | G   | S   | S   | E   | L   | W   | T   | L   | K   | P   | Q   |   |
|        |    |     |     |     |     |     |     |     |     |     |     |     |     |     |     |     |     |     |     |     |   |
| Gd-DNA | AA | CTG | AAG | GCT | CTT | CAC | TTC | CTT | CAA | AAG | TCG | GCG | GTT | AAG | CAA | CTG | TGC | CTT | TGC | TTC | C |
| Gp-DNA | AA | CTG | AAA | GCT | CTT | CAC | TTC | CTT | CAA | AAG | TCG | GCG | GTG | AAG | CAA | CTG | TGC | CTT | TGC | TTC | C |
| Ss-DNA | CC | CTA | GAA | CCT | CTT | CAT | TTC | CTC | CAG | AAG | AGT | CCC | GTC | AAG | CAA | CTT | ACG | CTA | TGC | TTC | C |
| Bf-DNA | CT | TTA | GAG | CCT | CTT | CAT | TTC | CTT | CAG | AAG | AGT | CAT | GTA | AAA | CAA | CTC | ACG | ATG | TGC | TTC | C |
| Gd-PRO | E  | L   | K   | A   | L   | H   | F   | L   | Q   | K   | S   | A   | V   | K   | Q   | L   | C   | L   | C   | F   |   |
| Gp-PRO | E  | L   | K   | A   | L   | H   | F   | L   | Q   | K   | S   | A   | V   | K   | Q   | L   | C   | L   | C   | F   |   |
| Ss-PRO | A  | L   | E   | P   | L   | H   | F   | L   | Q   | K   | S   | P   | V   | K   | Q   | L   | T   | L   | C   | F   |   |
| Bf-PRO | A  | L   | E   | P   | L   | H   | F   | L   | Q   | K   | S   | H   | V   | K   | Q   | L   | T   | M   | C   | F   |   |
|        |    |     |     |     |     |     |     |     |     |     |     |     |     |     |     |     |     |     |     |     |   |
| Gd-DNA | CC | GGC |     |     |     |     |     |     |     |     |     |     |     |     |     |     |     |     |     |     |   |
| Gp-DNA | CG | GGC |     |     |     |     |     |     |     |     |     |     |     |     |     |     |     |     |     |     |   |
| Ss-DNA | CT | GGA |     |     |     |     |     |     |     |     |     |     |     |     |     |     |     |     |     |     |   |
| Bf-DNA | CA | GGA |     |     |     |     |     |     |     |     |     |     |     |     |     |     |     |     |     |     |   |
| Gd-PRO | P  | G   |     |     |     |     |     |     |     |     |     |     |     |     |     |     |     |     |     |     |   |
| Gp-PRO | P  | G   |     |     |     |     |     |     |     |     |     |     |     |     |     |     |     |     |     |     |   |
| Ss-PRO | P  | G   |     |     |     |     |     |     |     |     |     |     |     |     |     |     |     |     |     |     |   |
| Bf-PRO | P  | G   |     |     |     |     |     |     |     |     |     |     |     |     |     |     |     |     |     |     |   |
